# Supplementary material
Source: PubMed Central journal article supplement (PMC4836368)
Supplement: supp_fj.201500048_Supplemental_Data.pdf [file supp_fj.201500048_Supplemental_Data.pdf]

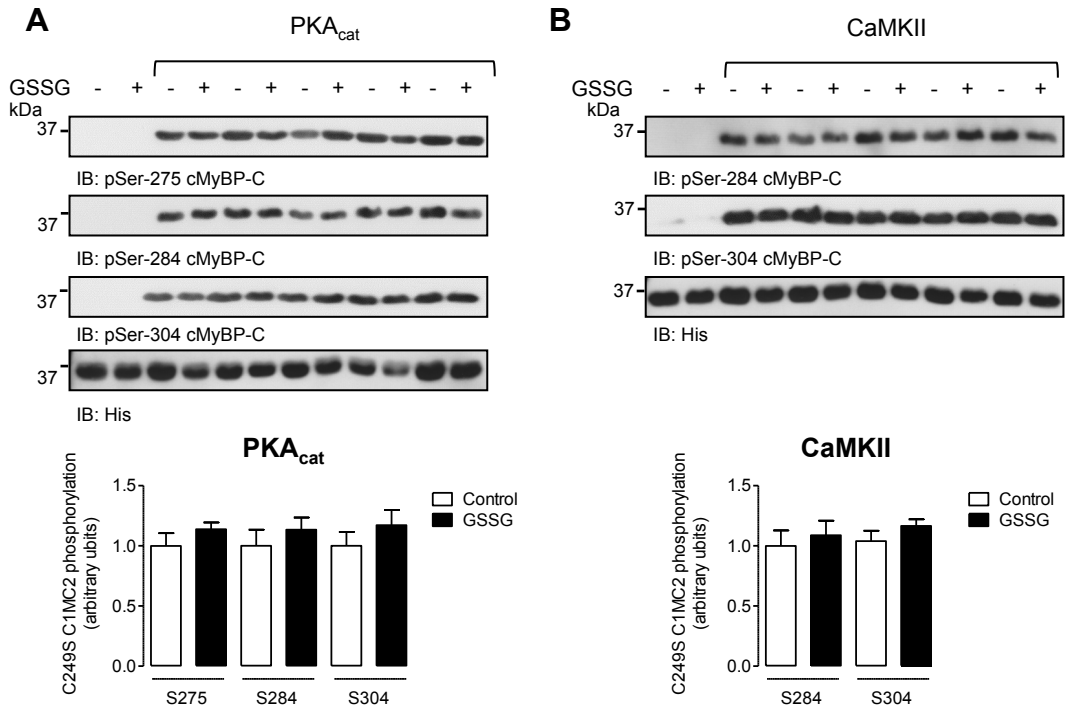

**Suppl Data 4- Effect of S-glutathiolation of C1-M-C2 C249S on protein kinase-mediated phosphorylation.**

Recombinant C1-M-C2 C249S was exposed to vehicle (control; white bars) or GSSG (1 mmol/L; 30 min; black bars) and subsequent phosphorylation by PKA (A; 30 min) or CaMK (B; 30 min) was assessed using phosphosite-specific antibodies for Ser275, Ser284 or Ser304. Protein loading was assessed with a His antibody. The bar charts summarize the data from 5 independent IVK experiments.

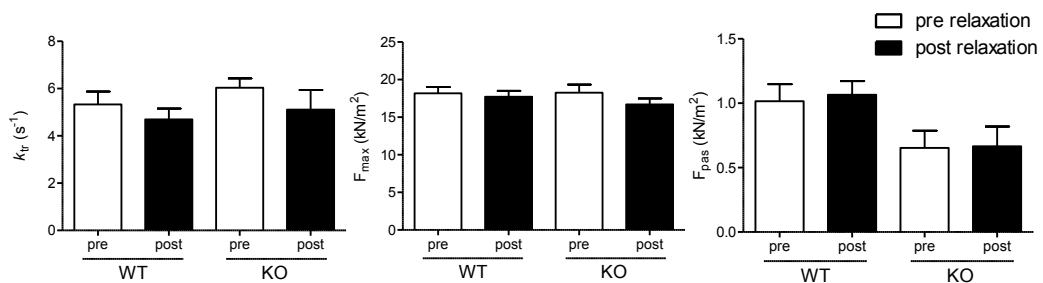

**Suppl Data 5- Effect of vehicle treatment on sarcomere function in skinned ventricular myocytes from WT and KO mice.**

Rate of force redevelopment ( $k_{tr}$ ) and  $Ca^{2+}$ -activated force ( $F_{max}$ ) was determined in activating solution ( $pCa$  4.5) and passive force ( $F_{pas}$ ) in relaxing solution ( $pCa$  9) in Triton-permeabilised ventricular myocytes from WT ( $n=3$ ; 10 myocytes) and KO ( $n=3$ ; 12 myocytes) mice. Bar charts show data obtained before (pre; white bars) and after (post; black bars) subjecting ventricular myocytes to a release-restretch protocol.
