# Supplementary material
Source: PubMed Central journal article supplement (PMC4836368)
Supplement: supp_fj.201500048_Supplemental_Data2.pdf [file supp_fj.201500048_Supplemental_Data2.pdf]

**Suppl Data 2:** Supporting tryptic and chymotryptic peptides for the C1-M-C2 region of recombinant human Myosin-binding protein C, cardiac-type (Q14896); n.d: non-detectable

| <b>DTT</b><br>Modification | MH <sup>+</sup><br>(theoretical) | MH <sup>+</sup><br>(experimental) | Error<br>(ppm) | Peptide                              |
|----------------------------|----------------------------------|-----------------------------------|----------------|--------------------------------------|
| <b>Trypsin</b>             |                                  |                                   |                |                                      |
| Cys (CAM)                  | 3173.4668                        | 3173.4966                         | 9.4            | (K)DKFDC(249)SNFNLTVHEAMGTGDLDLLSAFR |
| Cys (CAM) -<br>Cys (CAM)   | 2642.2548                        | 2642.2599                         | 1.9            | (K)RTLISQC(426)SLADDAAYQC(436)VVGGEK |
| Cys-Cys                    | 2526.2119                        | 2526.2078                         | -1.7           | (K)RTLISQC(426)SLADDAAYQC(436)VVGGEK |
| Cys (CAM)-<br>Cys (CAM)    | 2486.1537                        | 2486.1742                         | 8.2            | (K)RTLISQC(426)SLADDAAYQC(436)VVGGEK |
| Cys-Cys                    | 2370.1108                        | 2370.1265                         | 6.6            | (R)TLISQC(426)SLADDAAYQC(436)VVGGEK  |
| Cys (CAM)                  | 983.4866                         | 983.4859                          | -0.7           | (K)C(443)STELFVK                     |
| <b>Chymotrypsin</b>        |                                  |                                   |                |                                      |
| Cys (CAM)                  | 1269.6253                        | 1269.6267                         | 0.9            | (Y)RC(239)EVSTKDKF                   |
| Cys (CAM) -<br>Cys (CAM)   | 1892.8265                        | 1892.8257                         | -0.5           | (Y)RC(239)EVSTKDKFDC(249)SNF         |
| Cys (CAM)                  | 1414.6155                        | 1414.6155                         | 0.0            | (L)TISQC(426)SLADDAAY                |
| Cys (CAM) -<br>Cys (CAM)   | 1613.7298                        | 1613.7305                         | 0.4            | (Y)QC(436)VVGGEKC(443)STELF          |
| <b>GSSG</b>                |                                  |                                   |                |                                      |
| Modification               | MH <sup>+</sup><br>(theoretical) | MH <sup>+</sup><br>(experimental) | Error<br>(ppm) | Peptide                              |
| <b>Trypsin</b>             |                                  |                                   |                |                                      |
| Cys (CAM)                  | 3173.4668                        | 3173.4736                         | 2.2            | (K)DKFDC(249)SNFNLTVHEAMGTGDLDLLSAFR |
| Cys (GSSG)                 | 3421.5132                        | 3421.5388                         | 7.5            | (K)DKFDC(249)SNFNLTVHEAMGTGDLDLLSAFR |
| Cys (GSSG) -<br>Cys (GSSG) | 3138.3476                        | 3138.3352                         | -3.9           | (K)RTLISQC(426)SLADDAAYQC(436)VVGGEK |
| Cys (GSSG) -<br>Cys (CAM)  | 2890.3012                        | 2890.2902                         | -3.8           | (K)RTLISQC(426)SLADDAAYQC(436)VVGGEK |
| Cys (CAM) -<br>Cys (CAM)   | 2642.2548                        | 2642.2698                         | 5.7            | (K)RTLISQC(426)SLADDAAYQC(436)VVGGEK |
| Cys-Cys                    | 2526.2119                        | 2526.2139                         | 0.8            | (K)RTLISQC(426)SLADDAAYQC(436)VVGGEK |
| Cys (GSSG) -<br>Cys (GSSG) | 2982.2465                        | 2982.2689                         | 7.5            | (K)RTLISQC(426)SLADDAAYQC(436)VVGGEK |
| Cys (GSSG) -<br>Cys (CAM)  | 2734.2001                        | 2734.1813                         | -6.9           | (K)RTLISQC(426)SLADDAAYQC(436)VVGGEK |
| Cys (CAM) -<br>Cys (CAM)   | 2486.1537                        | 2486.1690                         | 6.2            | (K)RTLISQC(426)SLADDAAYQC(436)VVGGEK |
| Cys-Cys                    | 2370.1108                        | 2370.1101                         | -0.3           | (K)RTLISQC(426)SLADDAAYQC(436)VVGGEK |
| Cys (CAM)                  | 983.4866                         | 983.4880                          | 1.4            | (K)C(443)STELFVK                     |
| <b>Chymotrypsin</b>        |                                  |                                   |                |                                      |
| Cys (GSSG)                 | 1517.6717                        | n.d.                              |                | (Y)RC(239)EVSTKDKF                   |
| Cys (CAM)                  | 1269.6253                        | 1269.6271                         | 1.2            | (Y)RC(239)EVSTKDKF                   |
| Cys (GSSG) -<br>Cys (GSSG) | 2388.9193                        | 2388.9186                         | -0.6           | (Y)RC(239)EVSTKDKFDC(249)SNF         |
| Cys (GSSG) -<br>Cys (CAM)  | 2140.8729                        | n.d.                              |                | (Y)RC(239)EVSTKDKFDC(249)SNF         |
| Cys (CAM) -<br>Cys (GSSG)  | 2140.8729                        | 2140.8764                         | 1.4            | (Y)RC(239)EVSTKDKFDC(249)SNF         |
| Cys (CAM) -<br>Cys (CAM)   | 1892.8265                        | 1892.8241                         | -1.3           | (Y)RC(239)EVSTKDKFDC(249)SNF         |
| Cys (GSSG)                 | 1662.6619                        | 1662.6639                         | 1.0            | (L)TISQC(426)SLADDAAY                |
| Cys (CAM)                  | 1414.6155                        | 1414.6172                         | 1.2            | (L)TISQC(426)SLADDAAY                |
| Cys (GSSG) -<br>Cys (GSSG) | 2109.8226                        | n.d.                              |                | (Y)QC(436)VVGGEKC(443)STELF          |
| Cys (GSSG) -<br>Cys (CAM)  | 1861.7762                        | 1861.778                          | 0.8            | (Y)QC(436)VVGGEKC(443)STELF          |
| Cys (CAM) -<br>Cys (CAM)   | 1613.7298                        | 1613.7310                         | 0.7            | (Y)QC(436)VVGGEKC(443)STELF          |
